# Supplementary material
Source: PubMed Central journal article supplement (PMC7771207)

**A**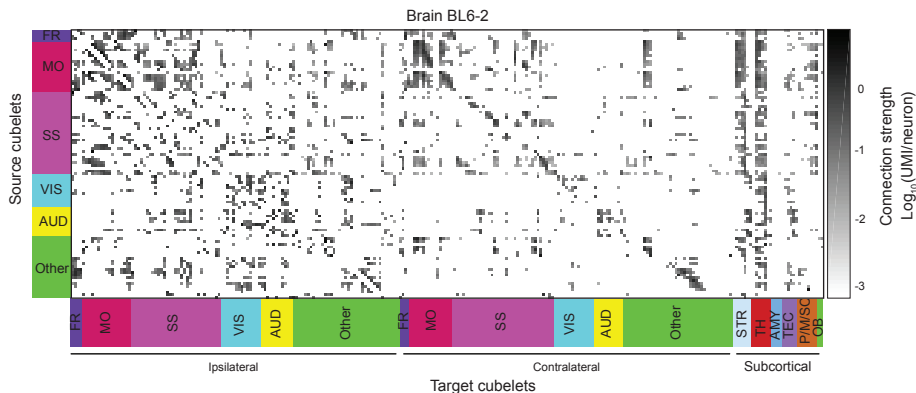**B**

Infer brain area-to-brain area connection: weighted averaging

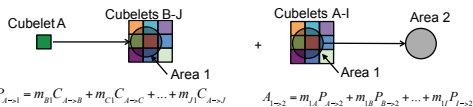**D**

Infer cubelet-to-brain area connection: weighted averaging

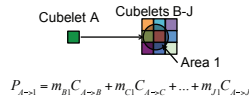**E**

Infer brain area-to-brain area connection: constrained optimization

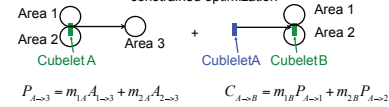**C1**

Brain BL6-1 (weighted averaging)

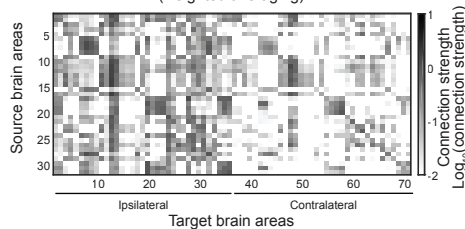**F1**

Brain BL6-1 (constrained optimization)

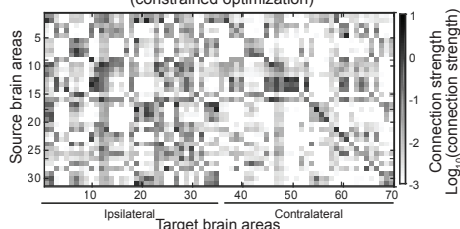**G**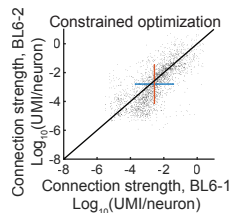**C2**

Brain BL6-2 (weighted averaging)

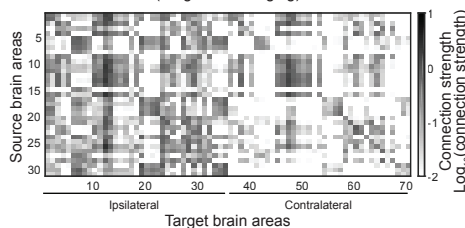**F2**

Brain BL6-2 (constrained optimization)

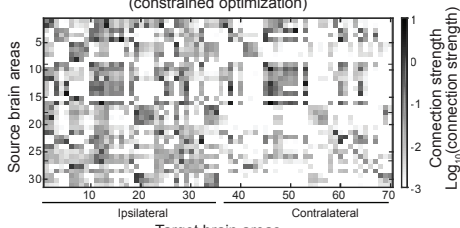**H**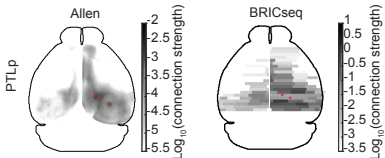**I**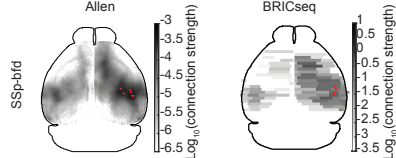**J**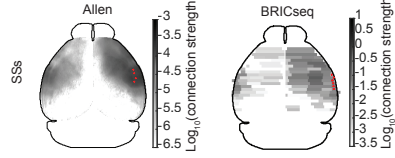

Supplement: NIHMS1608208-supplement-3.pdf [file NIHMS1608208-supplement-3.pdf]
