# Supplementary material
Source: PubMed Central journal article supplement (PMC7771207)

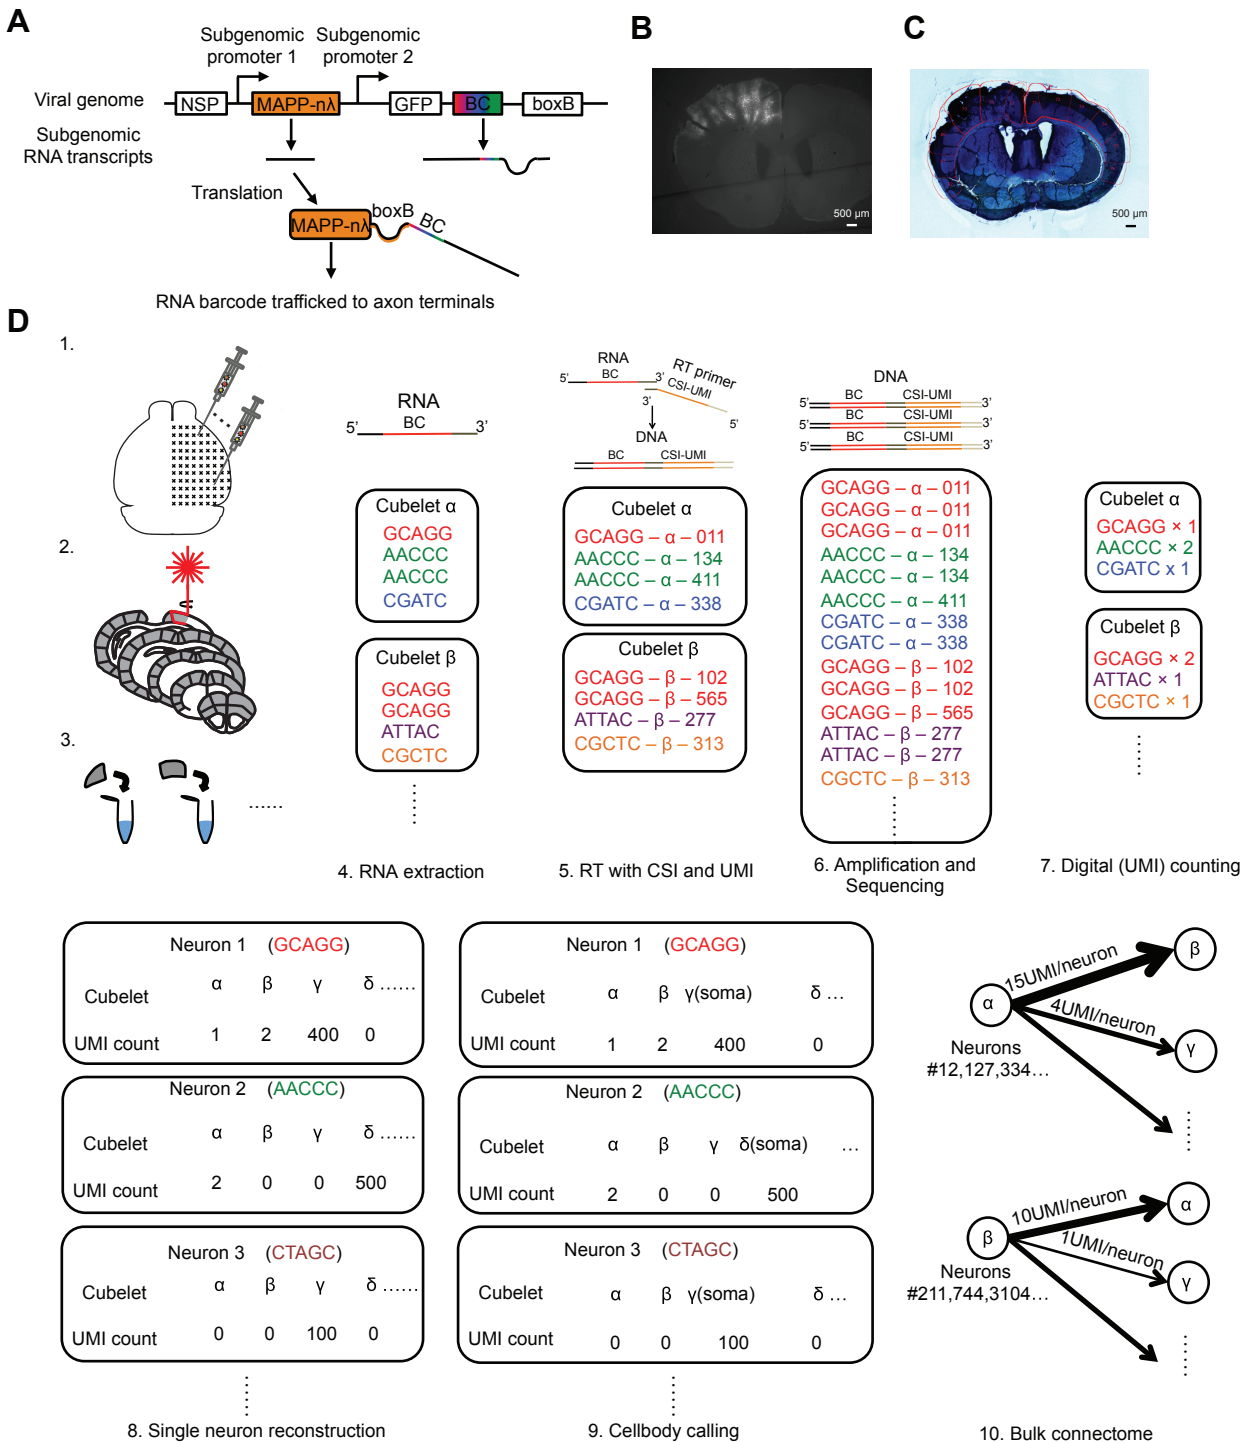

Supplement: NIHMS1608208-supplement-1.pdf [file NIHMS1608208-supplement-1.pdf]

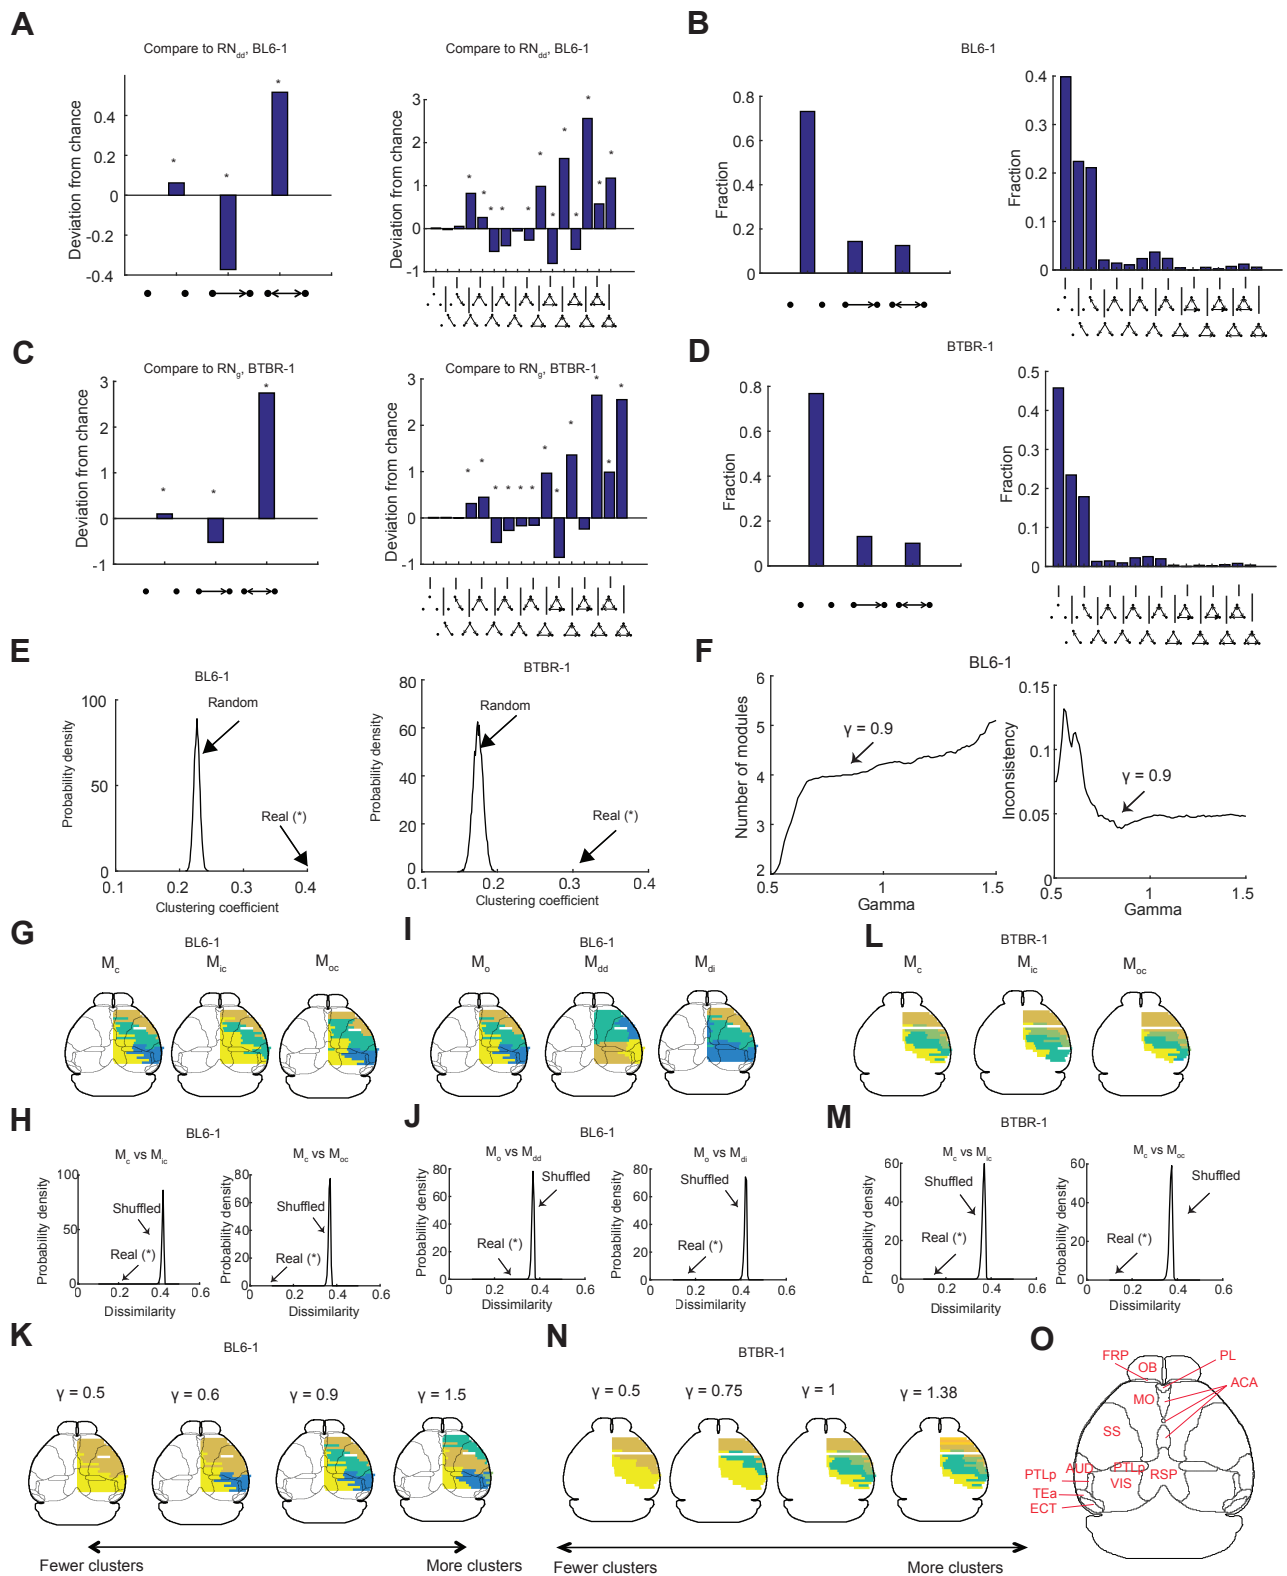

Supplement: NIHMS1608208-supplement-7.pdf [file NIHMS1608208-supplement-7.pdf]
